# Supplementary material for: Genome relationships and LTR-retrotransposon diversity in three cultivated Capsicum L. (Solanaceae) species
Source: PubMed Central journal article supplement (PMC7076952; doi:10.1186/s12864-020-6618-9), 2020-03-17
Supplement: 12864_2020_6618_MOESM1_ESM.pdf [file 12864_2020_6618_MOESM1_ESM.pdf]

## Supplementary Materials

Genome relationships and LTR retrotransposon diversity in three cultivated *Capsicum* L. (Solanaceae) species. Assis R, Baba VY, Cintra LA, Gonçalves LSA, Rodrigues R, Vanzela ALL.

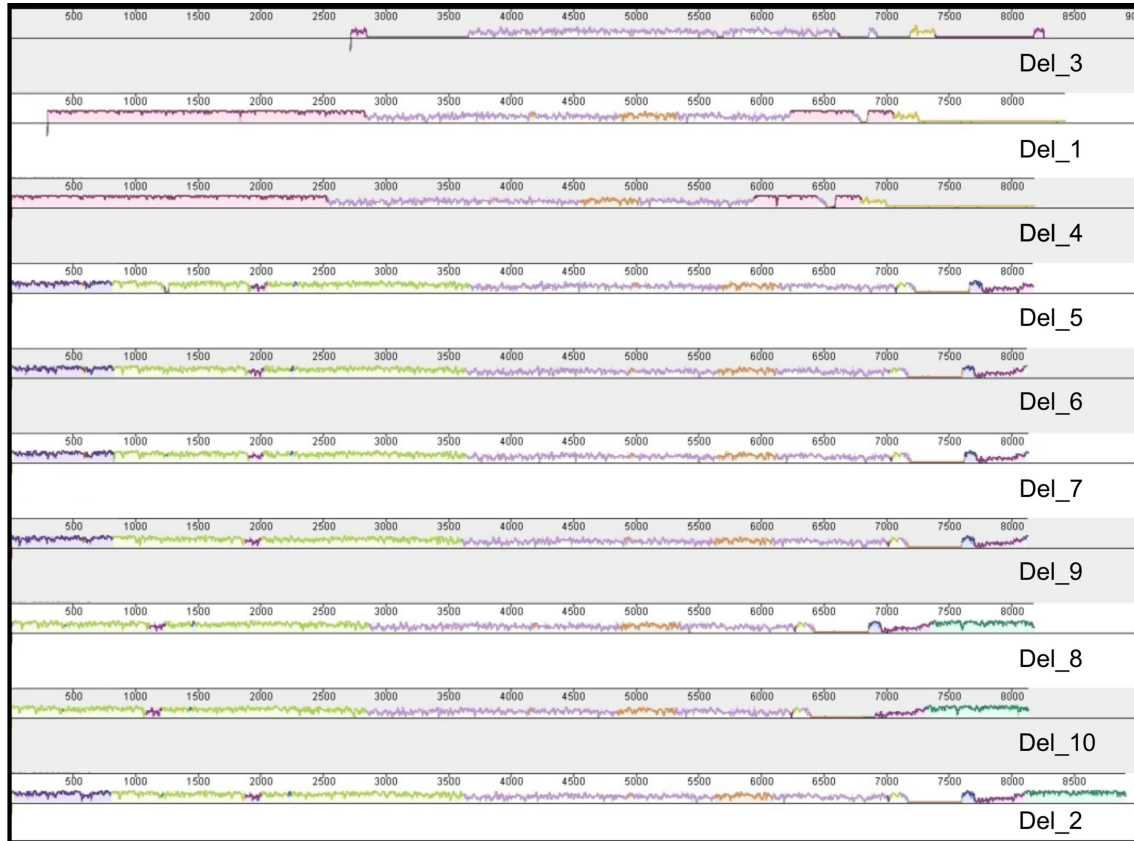

**Supplementary figure 1. Mauve alignment of Tekay/Del sequences from *Capsicum* genomes.** The graphical similarity was used as a parameter to determine the clusters of the Del sequences. Del\_3 from *C. annuum* make a group. Del\_1 from *C. annuum* and Del\_4 from *C. chinense* were grouped together, forming the second group. The third group was formed by sequences Del\_5, Del\_6, Del\_7 and Del\_9, exclusively from *C. baccatum*, such as the group formed by Del\_8 and Del\_10. The sequence Del\_2 from *C. annuum* was grouped alone. Note the differences among these sequences by the length and position of LTRs.

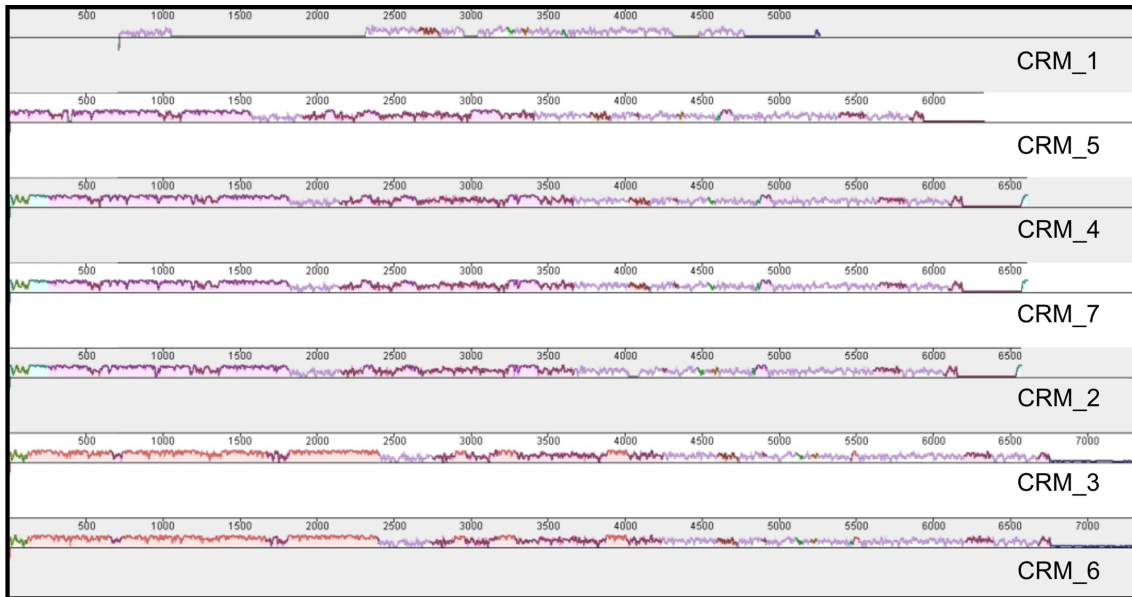

**Supplementary figure 2. Mauve alignment of CRM sequences from *Capsicum* genomes.** The graphical similarity was used as a parameter to determine the clusters of the CRM sequences. CRM\_1 from *C. annuum* and CRM\_5 from *C. baccatum* made each one a group. The sequences CRM\_4 from *C. annuum*, CRM\_7 from *C. chinense* and CRM\_2 from *C. annuum* were grouped together and the last group was formed by the sequences CRM\_3 from *C. annuum* and CRM\_6 from *C. chinense*. Note the differences among these sequences by the length and position of LTRs.

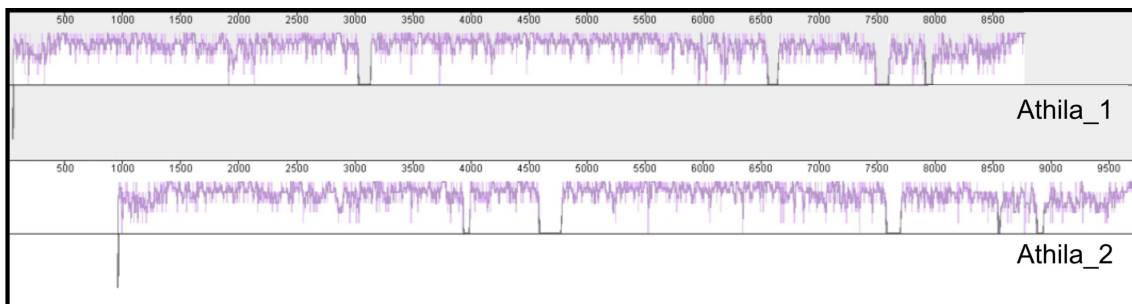

**Supplementary figure 3. Mauve alignment of Athila sequences from *Capsicum* genomes.** The graphical similarity was used as a parameter to determine the clusters of the Athila sequences from *C. annuum*. Each sequence made a group, note the differences between these sequences, especially for the length.

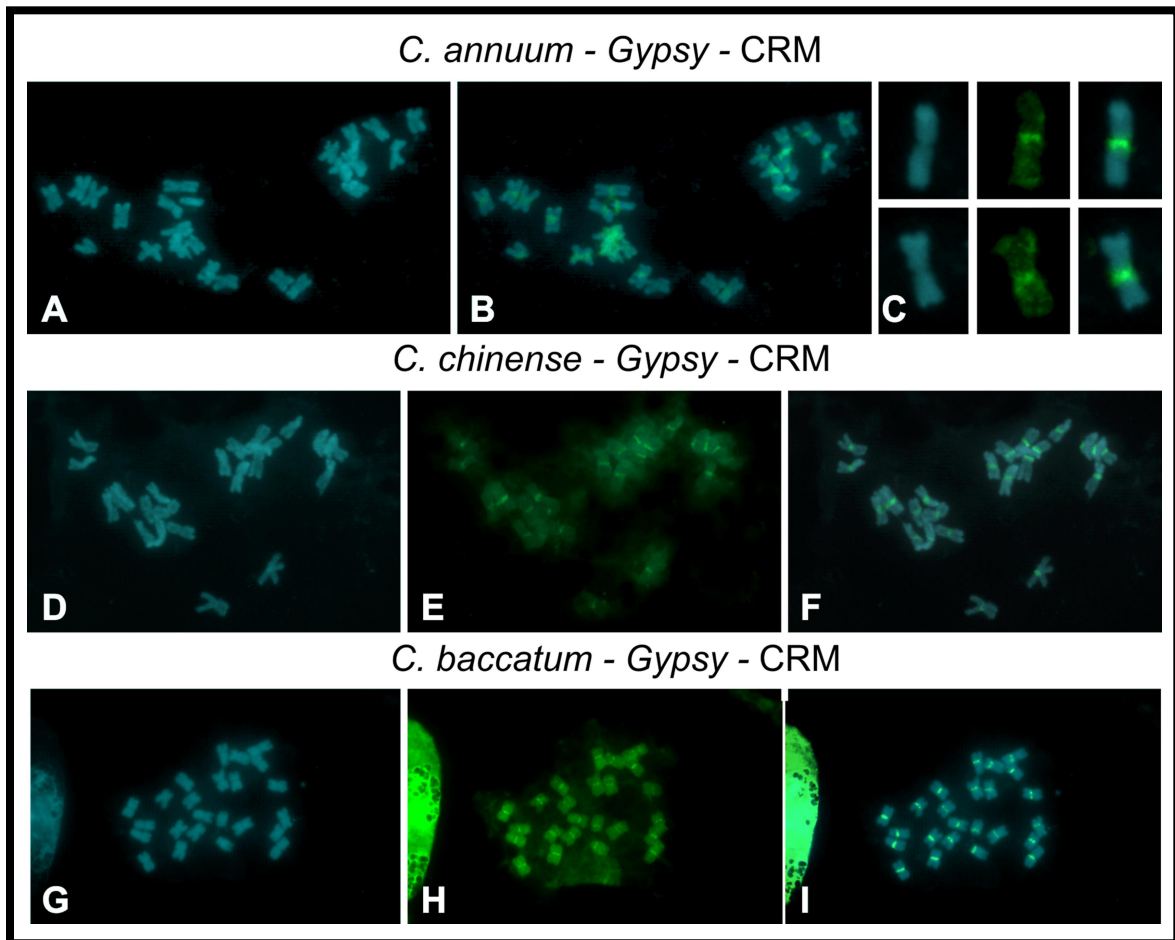

**Supplementary figure 4. FISH using LTR-RTs probes against metaphases and prometaphases of *Capsicum* species.** Chromosomes were counter-stained with DAPI (blue), CRM probes labelled with biotin-11-dUTP / avidin-FITC conjugate (green). The CRM probe exhibited a proximal pattern of hybridization signals in all species. **(A - B)** *C. annuum*. **(C)** Highlighted chromosomes from *C. annuum* exhibiting the proximal signal from CRM probe have been obtained from a different metaphase. **(D - F)** *C. chinense*. **(G - I)** *C. baccatum*. Note that the signals in *C. baccatum* were more intense than the ones observed in *C. annuum* and *C. chinense*.

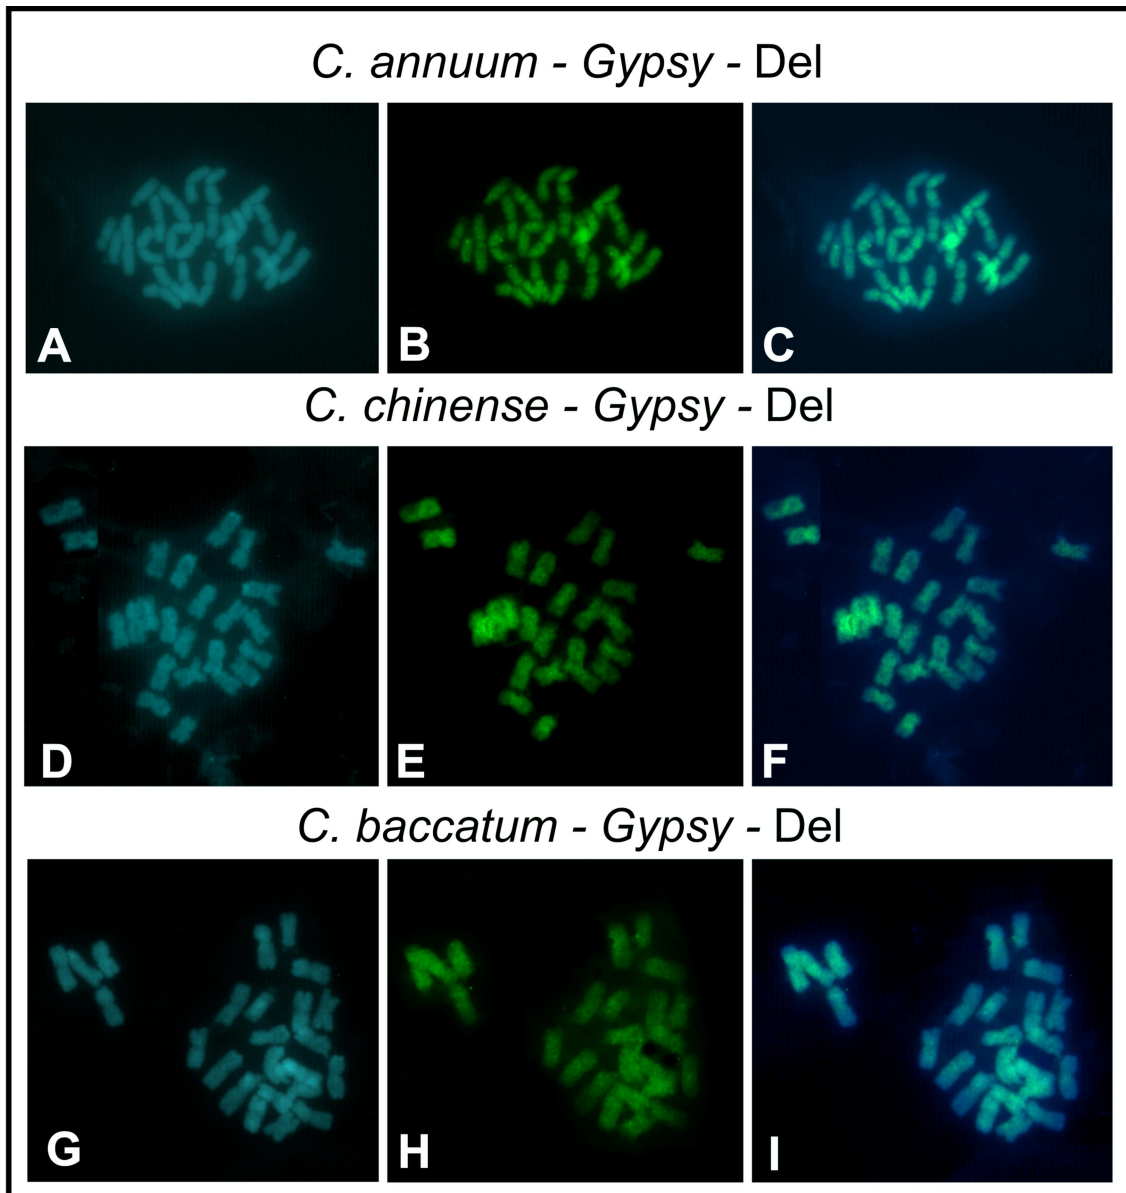

**Supplementary figure 5. FISH using LTR-RTs probes against metaphases and prometaphases of *Capsicum* species.** Chromosomes were counter-stained with DAPI (blue), Tekay/Del probes labelled with biotin-11-dUTP / avidin-FITC conjugate (green). The *Gypsy* Tekay/Del probe exhibited greater accumulation signals in *C. annuum* (A-C) than in the other two species, followed by *C. chinense* (D-F) than by *C. baccatum* (G-I), which showed less signals, although some chromosomes exhibit more intense signal than the others.

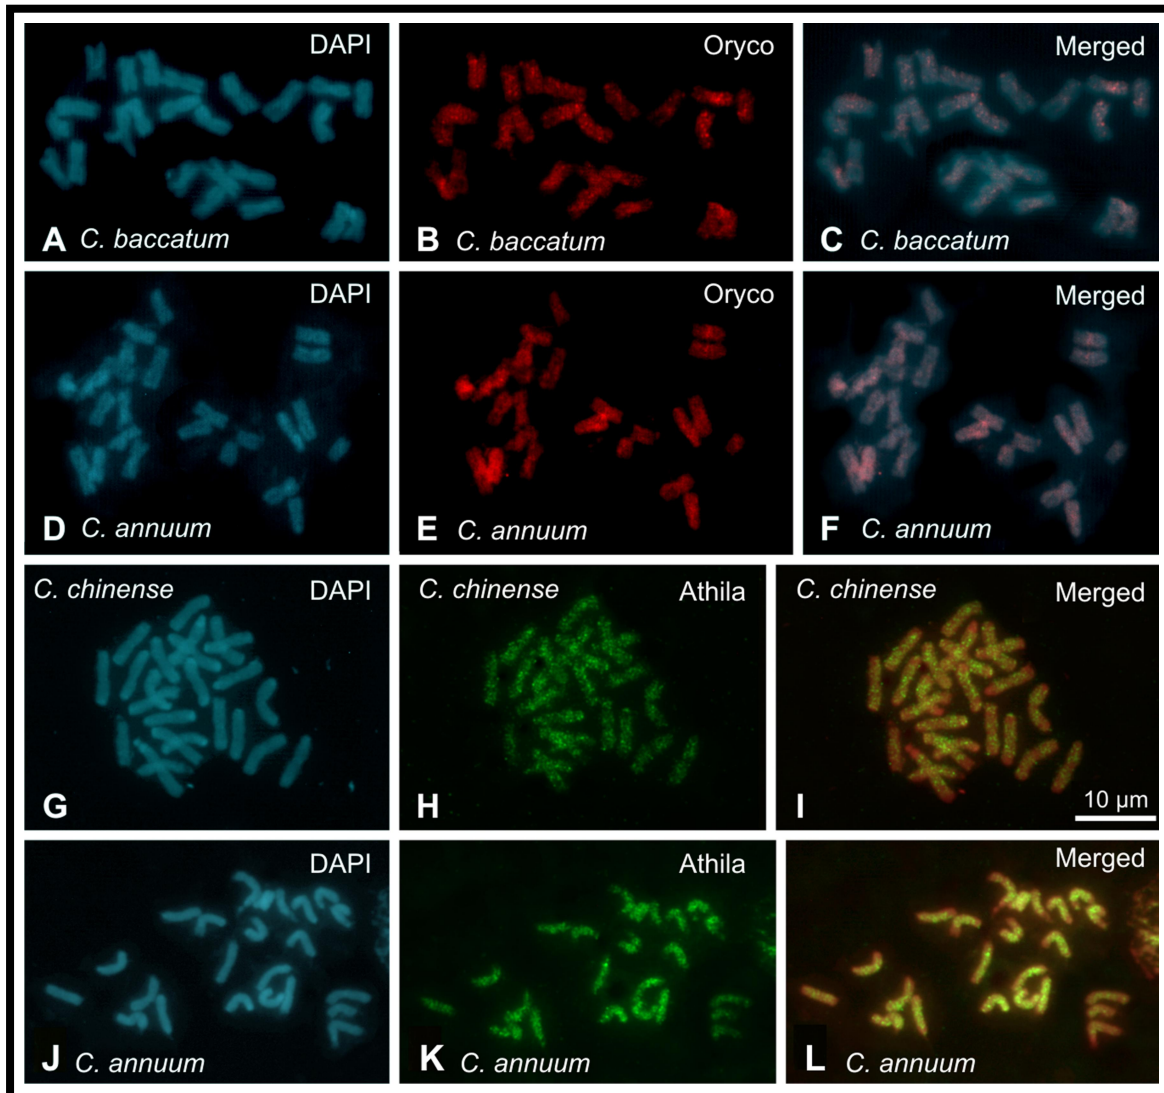

**Supplementary figure 6. FISH using LTR-RTs probes against metaphases and prometaphases of *Capsicum* species.** Chromosomes were counter-stained with DAPI (blue), *Copia* probes with Cy3-11-dUTP (red) and *Gypsy* probes labelled with biotin-11-dUTP / avidin-FITC conjugate (green). The *Copia* Ivana/Oryco exhibited few hybridization signals scattered along chromosomes, with a low accumulated profile in both *C. baccatum* (A – C) and *C. annuum* (D - F). The *Gypsy* Athila/Tat probe showed accumulation in the pericentromeric to interstitial regions of all chromosomes of *C. chinense* (G - I) and *C. annuum* (J – L), although some chromosomes exhibit a greater accumulation than others, but this was restricted a just few chromosomes pairs. (I) Bar represents 10 µm.

Supplementary Table 1. Frequency and relative values of repetitive fraction in the three *Capsicum* genomes.

| Species/Lineages |              | <i>C. annuum</i> |         |          |          | <i>C. chinense</i> |         |           |          | <i>C. baccatum</i> |        |          |          |
|------------------|--------------|------------------|---------|----------|----------|--------------------|---------|-----------|----------|--------------------|--------|----------|----------|
|                  |              | num seq          | NR (%)  | size bp  | size CR% | num seq            | NR (%)  | size bp   | size CR% | num seq            | NR (%) | size bp  | size CR% |
| Copia            | Ivana/Oryco  | 0                | 0.00    | 0        | 0.00     | 0                  | 0.00    | 0         | 0.00     | 0                  | 0.00   | 0        | 0.00     |
|                  | Sire         | 6065             | 1.38    | 1161677  | 1.38     | 7037               | 1.75    | 1198669   | 0.23     | 2386               | 0.64   | 403471   | 0.51     |
|                  | Ale/Retrofit | 1292             | 0.29    | 175175   | 0.21     | 1959               | 0.49    | 156214    | 0.03     | 996                | 0.27   | 139797   | 0.18     |
|                  | Alesia       | 4                | 0.00    | 139      | 0.00     | 14                 | 0.00    | 470       | 0.00     | 3                  | 0.00   | 103      | 0.00     |
|                  | Bryco        | 12               | 0.00    | 476      | 0.00     | 34                 | 0.01    | 1236      | 0.00     | 4                  | 0.00   | 116      | 0.00     |
|                  | Gymco        | 22               | 0.01    | 804      | 0.00     | 85                 | 0.02    | 3233      | 0.00     | 50                 | 0.01   | 2101     | 0.00     |
|                  | Osser        | 45               | 0.01    | 1335     | 0.00     | 65                 | 0.02    | 2534      | 0.00     | 6                  | 0.00   | 241      | 0.00     |
|                  | Ikeros       | 0                | 0.00    | 0        | 0.00     | 0                  | 0.00    | 0         | 0.00     | 0                  | 0.00   | 0        | 0.00     |
|                  | Lyc0         | 7                | 0.00    | 341      | 0.00     | 12                 | 0.00    | 499       | 0.00     | 17                 | 0.00   | 610      | 0.00     |
|                  | Angela       | 7                | 0.00    | 357      | 0.00     | 18                 | 0.00    | 726       | 0.00     | 0                  | 0.00   | 0        | 0.00     |
|                  | Tar          | 2928             | 0.67    | 1206559  | 1.43     | 66                 | 0.02    | 2975      | 0.00     | 6550               | 1.77   | 4755842  | 5.98     |
|                  | Bianca       | 12               | 0.00    | 524      | 0.00     | 17                 | 0.00    | 551       | 0.00     | 7                  | 0.00   | 280      | 0.00     |
|                  | Tork         | 2452             | 0.56    | 439027   | 0.52     | 2312               | 0.58    | 354600    | 0.07     | 2223               | 0.60   | 475825   | 0.60     |
|                  | Total Copia  |                  | 12846   | 2.92     | 2986414  | 3.54               | 11619   | 2.90      | 1721707  | 0.33               | 12242  | 3.31     | 5778386  |
| Gypsy            | Tekay/Del    | 314401           | 71.57   | 57116162 | 67.68    | 269454             | 67.17   | 492211359 | 95.43    | 63219              | 17.08  | 12491685 | 15.70    |
|                  | Reina        | 1340             | 0.31    | 174430   | 0.21     | 1757               | 0.44    | 157406    | 0.03     | 1012               | 0.27   | 142756   | 0.18     |
|                  | CRM          | 4645             | 1.06    | 942613   | 1.12     | 3834               | 0.96    | 640754    | 0.12     | 12925              | 3.49   | 2867265  | 3.60     |
|                  | Galadriel    | 1540             | 0.35    | 346734   | 0.41     | 3448               | 0.86    | 692338    | 0.13     | 1595               | 0.43   | 429635   | 0.54     |
|                  | Tcn1         | 6                | 0.00    | 275      | 0.00     | 26                 | 0.01    | 990       | 0.00     | 6                  | 0.00   | 266      | 0.00     |
|                  | Chlamyvir    | 0                | 0.00    | 0        | 0.00     | 0                  | 0.00    | 0         | 0.00     | 0                  | 0.00   | 0        | 0.00     |
|                  | Selgy        | 9                | 0.00    | 771      | 0.00     | 15                 | 0.00    | 482       | 0.00     | 5                  | 0.00   | 211      | 0.00     |
|                  | Phygy        | 6                | 0.00    | 164      | 0.00     | 22                 | 0.01    | 760       | 0.00     | 8                  | 0.00   | 759      | 0.00     |
|                  | OTA/Retand   | 0                | 0.00    | 0        | 0.00     | 0                  | 0.00    | 0         | 0.00     | 0                  | 0.00   | 0        | 0.00     |
|                  | OTA/Ogre     | 34382            | 7.83    | 6697714  | 7.94     | 37020              | 9.23    | 6980112   | 1.35     | 112366             | 30.36  | 28130817 | 35.36    |
|                  | OTA/Tat      | 23038            | 5.24    | 4904332  | 5.81     | 21420              | 5.34    | 4370374   | 0.85     | 24526              | 6.63   | 5867540  | 7.38     |
| OTA/Athila       | 12740        | 2.90             | 2205937 | 2.61     | 16090    | 4.01               | 2674968 | 0.52      | 89251    | 24.12              | 403471 | 0.51     |          |
| Total Gypsy      |              | 392107           | 89.26   | 72389132 | 85.77    | 353086             | 88.02   | 507729543 | 98.43    | 304913             | 82.40  | 50334405 | 63.27    |
| Bel              |              | 257              | 0.06    | 10350    | 0.01     | 871                | 0.22    | 43039     | 0.01     | 225                | 0.06   | 9014     | 0.01     |
| DIRS             |              | 12575            | 2.86    | 5060780  | 6.00     | 0                  | 0.00    | 0         | 0.00     | 3619               | 0.98   | 1430071  | 1.80     |
| Penelope         |              | 4                | 0.00    | 138      | 0.00     | 15                 | 0.00    | 1266      | 0.00     | 1                  | 0.00   | 22       | 0.00     |
| Total LTR-RTs    |              | 405214           | 92.24   | 75386034 | 89.32    | 365591             | 91.14   | 509495555 | 98.78    | 317381             | 85.77  | 56121827 | 70.55    |

| Species/Lineages  |                | <i>C. annuum</i> |        |          |          | <i>C. chinense</i> |        |           |          | <i>C. baccatum</i> |        |          |          |
|-------------------|----------------|------------------|--------|----------|----------|--------------------|--------|-----------|----------|--------------------|--------|----------|----------|
|                   |                | num seq          | NR (%) | size bp  | size CR% | num seq            | NR (%) | size bp   | size CR% | num seq            | NR (%) | size bp  | size CR% |
| LINE              | L1             | 2305             | 2,63   | 246443   | 0.29     | 1958               | 0.49   | 152163    | 0.03     | 627                | 0.17   | 55746    | 0.07     |
|                   | RTE            | 1010             | 1,15   | 1537280  | 1.82     | 1034               | 0.26   | 133630    | 0.03     | 2537               | 0.69   | 1052374  | 1.32     |
| SINE              |                | 504              | 0,58   | 82281    | 0.10     | 313                | 0.08   | 11064     | 0.00     | 484                | 0.13   | 92928    | 0.12     |
| Total Non-LTR-RTs |                | 3819             | 4,36   | 1866004  | 2.21     | 3305               | 0.82   | 296857    | 0.06     | 3648               | 0.99   | 1201048  | 1.51     |
| Total Class I     |                | 405214           | 92.24  | 77252038 | 91.54    | 368896             | 91.96  | 509792412 | 98.83    | 321029             | 86.75  | 57322875 | 72.06    |
| Virus-like        | Caulimovirus   | 499              | 0.11   | 39112    | 0.05     | 510                | 0.13   | 26444     | 0.01     | 272                | 0.07   | 23533    | 0.03     |
|                   | Soymovirus     | 181              | 0.04   | 7370     | 0.01     | 279                | 0.07   | 11751     | 0.00     | 52                 | 0.01   | 2239     | 0.00     |
|                   | Cavemovirus    | 63               | 0.01   | 4338     | 0.01     | 56                 | 0.01   | 2539      | 0.00     | 21                 | 0.01   | 1095     | 0.00     |
|                   | Tungrovirus    | 1                | 0.00   | 24       | 0.00     | 6                  | 0.00   | 221       | 0.00     | 0                  | 0.00   | 0        | 0.00     |
|                   | Badnavirus     | 378              | 0.09   | 30295    | 0.04     | 463                | 0.12   | 21442     | 0.00     | 287                | 0.08   | 16230    | 0.02     |
|                   | Pararetrovirus | 249              | 0.06   | 46075    | 0.05     | 78                 | 0.02   | 8670      | 0.00     | 539                | 0.15   | 142402   | 0.18     |
| Total Virus-like  |                | 1371             | 0.31   | 127214   | 0.15     | 1392               | 0.35   | 71067     | 0.01     | 1171               | 0.32   | 185499   | 0.23     |
| Transposons       | CACTA          | 498              | 0.11   | 32067    | 0.04     | 969                | 0.24   | 49043     | 0.01     | 405                | 0.11   | 26019    | 0.03     |
|                   | Merlin         | 1                | 0.00   | 14       | 0.00     | 6                  | 0.00   | 309       | 0.00     | 0                  | 0.00   | 0        | 0.00     |
|                   | Sola           | 24545            | 5.59   | 4856624  | 5.75     | 23037              | 5.74   | 4843863   | 0.94     | 25145              | 6.79   | 5816849  | 7.31     |
|                   | PiggyBac       | 1                | 0.00   | 71       | 0.00     | 9                  | 0.00   | 662       | 0.00     | 5                  | 0.00   | 275      | 0.00     |
|                   | P              | 9                | 0.00   | 314      | 0.00     | 30                 | 0.01   | 1882      | 0.00     | 15                 | 0.00   | 627      | 0.00     |
|                   | Novosib        | 3                | 0.00   | 69       | 0.00     | 13                 | 0.00   | 418       | 0.00     | 0                  | 0.00   | 0        | 0.00     |
|                   | Kolobok        | 5                | 0.00   | 137      | 0.00     | 18                 | 0.00   | 712       | 0.00     | 12                 | 0.00   | 527      | 0.00     |
|                   | hAT            | 3948             | 0.90   | 840183   | 1.00     | 1223               | 0.30   | 89327     | 0.02     | 2934               | 0.79   | 1234232  | 1.55     |
|                   | PIF-Harbinger  | 314              | 0.07   | 11235    | 0.01     | 503                | 0.13   | 18601     | 0.00     | 254                | 0.07   | 10921    | 0.01     |
|                   | Tc1-Mariner    | 88               | 0.02   | 3775     | 0.00     | 213                | 0.05   | 9885      | 0.00     | 48                 | 0.01   | 2272     | 0.00     |
|                   | MuDR           | 580              | 0.13   | 41665    | 0.05     | 1096               | 0.27   | 52668     | 0.01     | 416                | 0.11   | 31131    | 0.04     |
|                   | MITEs          | 289              | 0.07   | 22601    | 0.03     | 486                | 0.12   | 14744     | 0.00     | 153                | 0.04   | 20893    | 0.03     |
| Crypton           | 37             | 0.01             | 1751   | 0.00     | 95       | 0.02               | 3358   | 0.00      | 19       | 0.01               | 660    | 0.00     |          |
| Helitrons         | 413            | 0.09             | 29682  | 0.04     | 904      | 0.23               | 49385  | 0.01      | 171      | 0.05               | 9904   | 0.01     |          |
| Polintons         | 7              | 0.00             | 247    | 0.00     | 25       | 0.01               | 1016   | 0.00      | 5        | 0.00               | 179    | 0.00     |          |
| Total Class II    |                | 30738            | 7.00   | 5840435  | 6.92     | 28627              | 7.14   | 5135873   | 1.00     | 29582              | 7.99   | 7154489  | 8.99     |
| 5S rDNA           |                | 717              | 0.16   | 89820    | 0.11     | 1370               | 0.34   | 172715    | 0.03     | 199                | 0.05   | 30499    | 0.04     |
| 35S rDNA          |                | 1267             | 0.29   | 1086206  | 1.29     | 849                | 0.21   | 637555    | 0.12     | 18075              | 4.88   | 14858366 | 18.68    |

| Species/Lineages | <i>C. annuum</i> |        |            |          | <i>C. chinense</i> |        |            |          | <i>C. baccatum</i> |        |            |          |
|------------------|------------------|--------|------------|----------|--------------------|--------|------------|----------|--------------------|--------|------------|----------|
|                  | num seq          | NR (%) | size bp    | size CR% | num seq            | NR (%) | size bp    | size CR% | num seq            | NR (%) | size bp    | size CR% |
| Total rDNA       | 1984             | 0.45   | 1176026    | 1.39     | 2219               | 0.55   | 810270     | 0.16     | 18274              | 4.94   | 14888865   | 18.72    |
| TOTAL            | 439307           | 100.00 | 84395713   | 100.00   | 401134             | 100.00 | 515809622  | 100.00   | 370056             | 100.00 | 79551728   | 100.00   |
| input contigs    | 37989            |        | 3063651248 |          | 51917              |        | 3009228238 |          | 25349              |        | 3215433722 |          |
| mapped contigs   | 26372            |        | 84395713   |          | 36647              |        | 515809622  |          | 19808              |        | 79551728   |          |
| % mapped         | 69.42            |        | 2.75       |          | 70.59              |        | 17.14      |          | 78.14              |        | 2.47       |          |

Repetitive fraction comparison in *Capsicum* genomes. num seq – number of sequences found after the Blast rounds. NR (%) – relative value. Size bp – total length of a repetitive class. Size CR (%) – percentage that the class represents in the scaffolds.



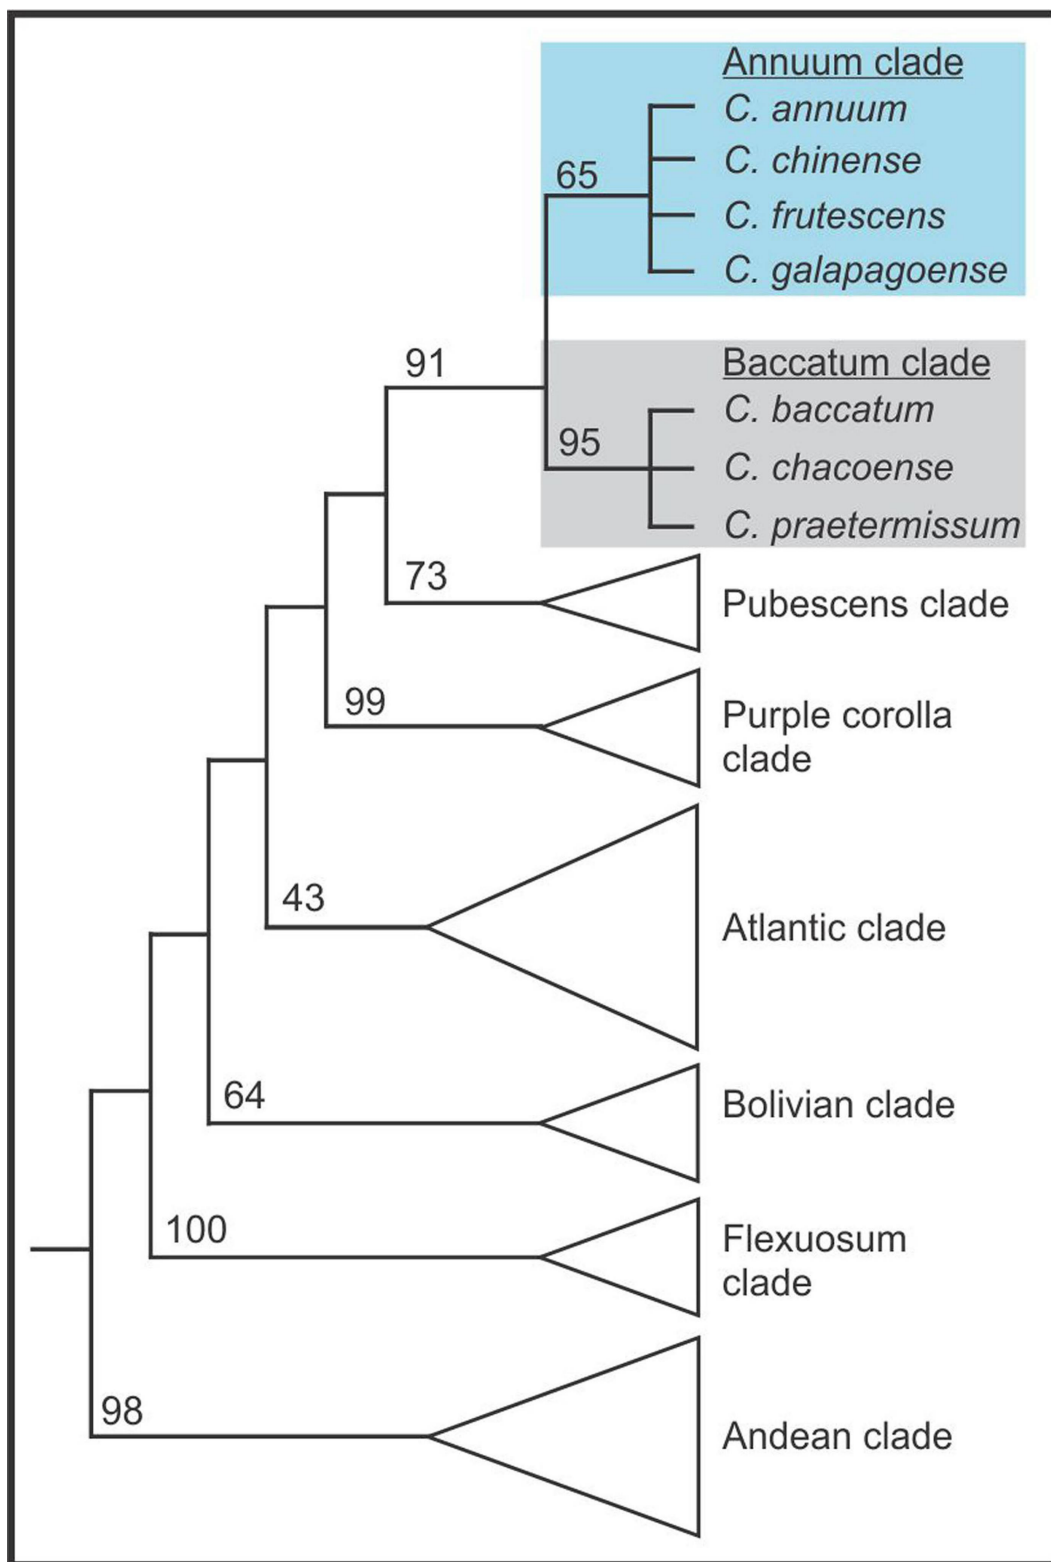

**Supplementary figure 7. Phylogeny for *Capsicum* adapted from Carizzo-Garcia et al. (2016).** Box in blue color highlight the Annuum clade, that contains *C. annuum*, *C. chinense*, *C. frutescens* and *C. galapagoense*. In gray the Baccatum clade highlighting *C. baccatum*, *C. chacoense* and *C. praetermissum*. The support values for the clusters are the same as those found in the tree constructed by maximum parsimony analysis of Carizzo-Garcia and colleagues.
